# Supplementary material
Source: PubMed Central journal article supplement (PMC10066527)
Supplement: mmc1.pdf [file mmc1.pdf]

**Supplemental information**

**Endogenous IFITMs boost SARS-coronavirus 1 and 2  
replication whereas overexpression inhibits  
infection by relocalizing ACE2**

**Qinya Xie, Caterina Prelli Bozzo, Laura Eiben, Sabrina Noettger, Dorota Kmiec, Rayhane Nchioua, Daniela Niemeyer, Meta Volcic, Jung-Hyun Lee, Fabian Zech, Konstantin M.J. Sparrer, Christian Drosten, and Frank Kirchhoff**

## SUPPLEMENTAL FIGURES

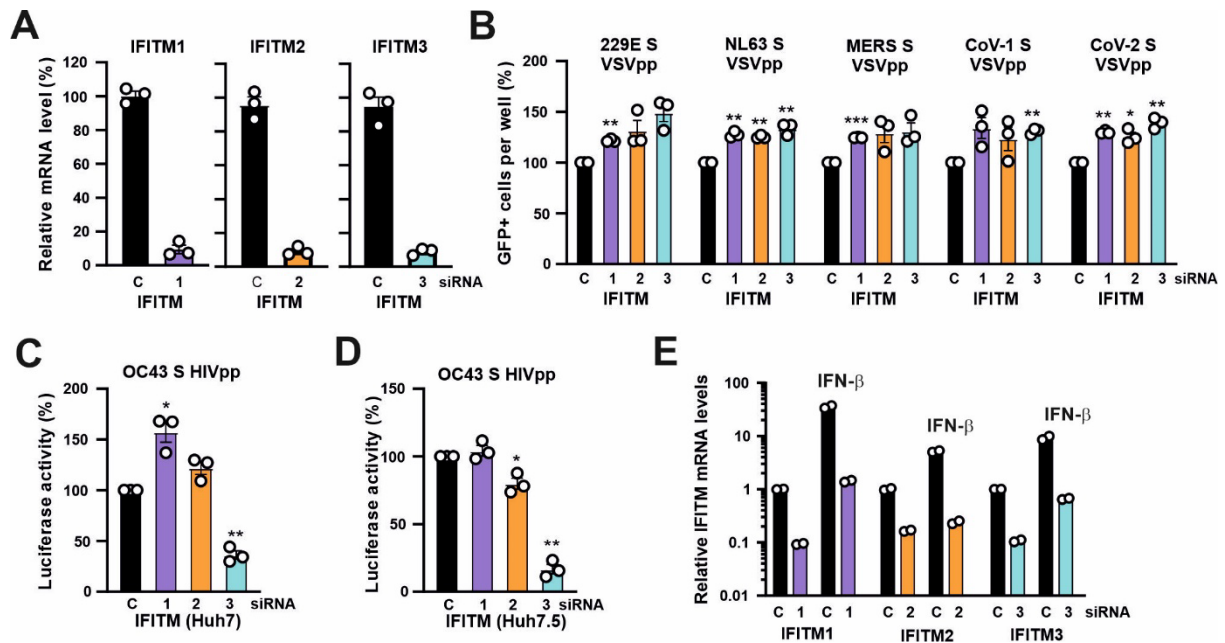

**Figure S1 (related to Figure 2). Effect of IFITM siRNA silencing on infection by S-containing viral pseudo-particles.**

(A) Levels of IFITM mRNAs in Huh7 cells transfected with non-targeting siRNA or siRNAs targeting the indicated IFITMs. Levels of the respective IFITM mRNAs are shown relative to those measured in cells treated the control siRNA (100%). Bars in panels A-D represent the mean of three independent experiments ( $\pm$ SEM). \*,  $p < 0.05$ ; \*\*,  $p < 0.01$ ; \*\*\*,  $p < 0.001$ . (B) Huh7 cells were transfected with non-targeting siRNA or siRNAs targeting the indicated IFITMs and infected with 229E, NL63, MERS, CoV-1 or CoV-2 S-containing VSVpp at the next day. Cytation for GFP+ cells was performed 24h post-infection. (C) Huh7 or (D) Huh7.5 cells were transfected with the indicate siRNAs, infected with OC43 S HIVpp on the following day and luciferase activities were measured 48h post-infection. (E) Levels of IFITM mRNAs in Huh7 cells that were left untreated or treated with IFN- $\beta$  and transfected with non-targeting siRNA or siRNAs targeting the indicated IFITMs. Levels of the respective IFITM mRNAs are shown relative to those measured in the absence of IFN- $\beta$  in cells treated the control siRNA (100%).

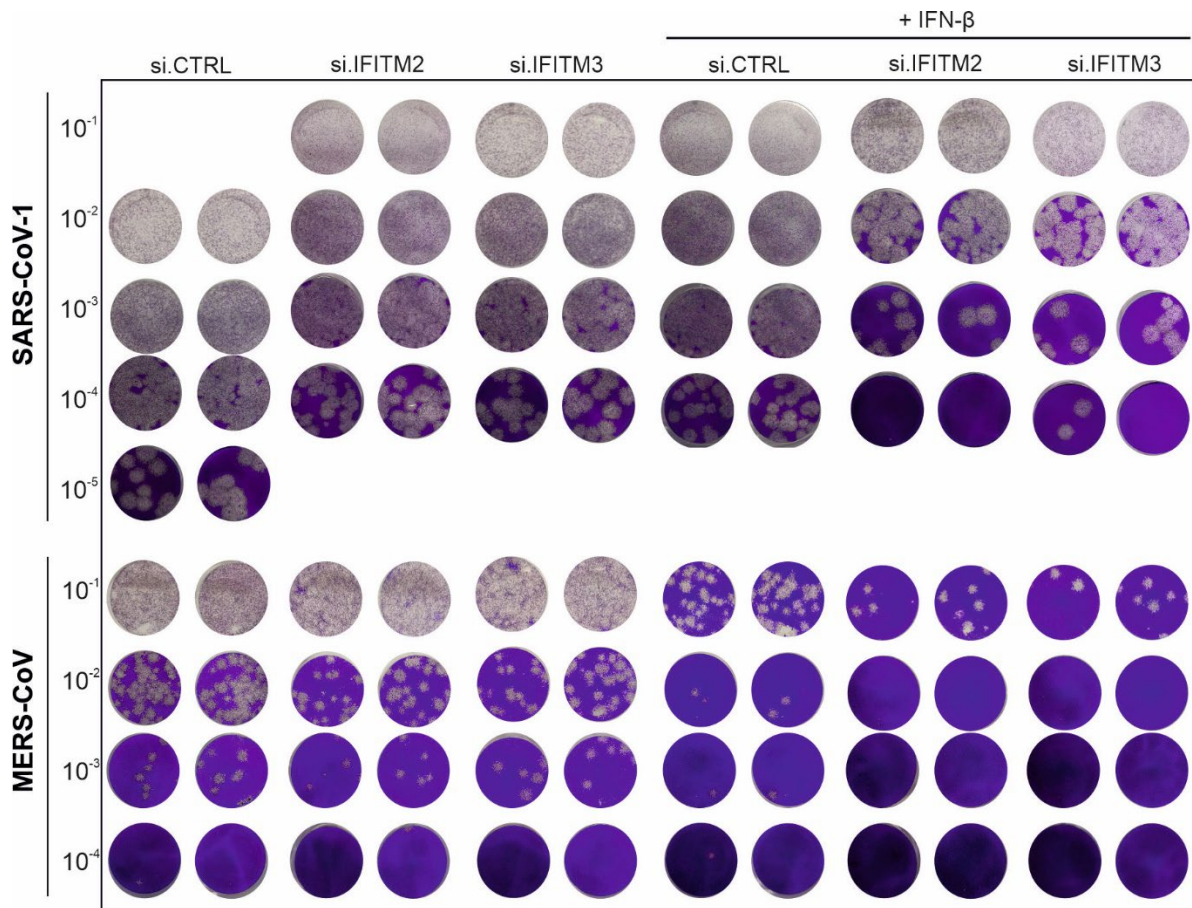

**Figure S2 (related to Figure 4). Impact of endogenous IFIM2 or IFITM3 expression on production of infectious SARS-CoV-1 or MERS-CoV particles.**

Shown are primary data of plaque-forming unit assays using the supernatants of the experiment shown in Figure 4D and 4E.

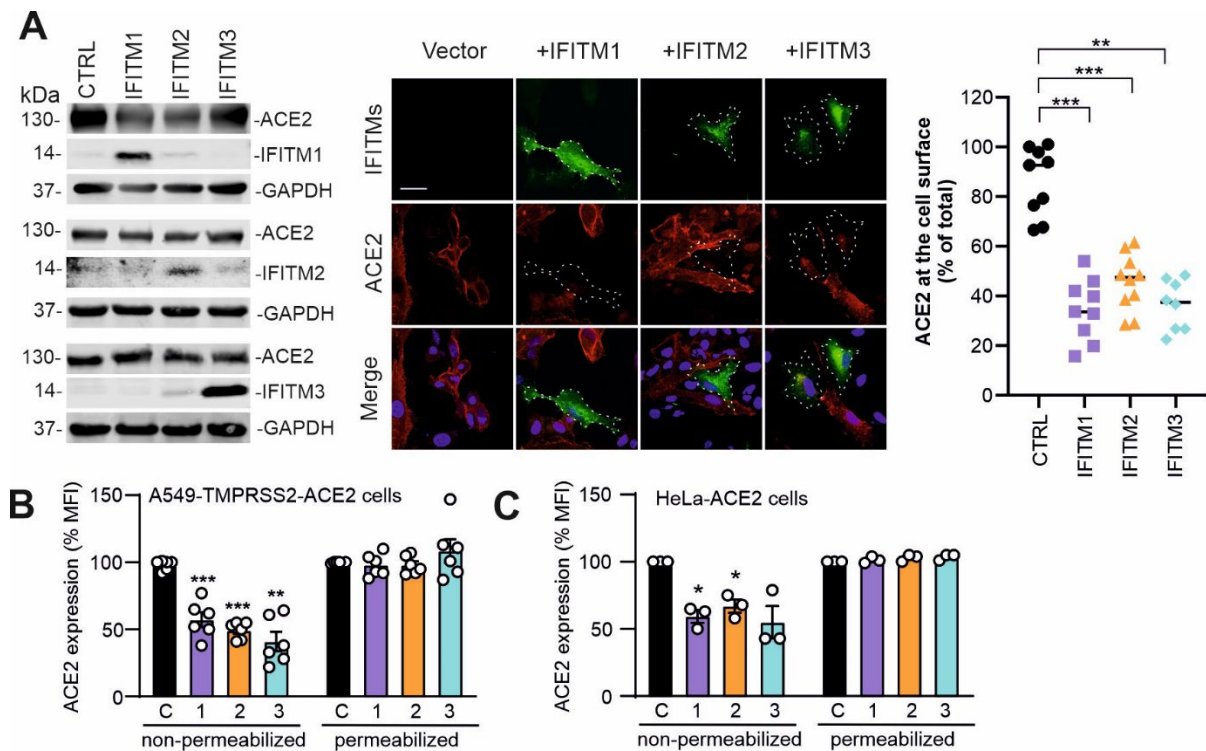

**Figure S3 (related to Figure 6). IFITM overexpression impairs cell surface expression of ACE2.** (A) A549-TMPRSS2-ACE2 were transfected with either IFITM1, IFITM2 or IFITM3 expression constructs or an empty control vector. Forty-eight hours post-transfection cells were harvested for Western blot analysis (left) or stained with anti-ACE2 and examined by confocal microscopy (middle). ACE2 signal intensities at the cell surface and in the cytoplasm were quantified using Image J (right). (B, C) A549-TMPRSS2-ACE2 cells (B) of HeLa stably expressing ACE2 (C) were transfected with either IFITM1, IFITM2 or IFITM3 expression constructs. 48 h post-transfection, cells were permeabilized (left panels) or not (right panels), stained with anti-ACE2 antibody and analyzed by flow cytometry. Shown are mean fluorescence intensities (MFIs) measured in cells transfected with IFITM expression vectors relative to those that received the control construct (100%). Bars represent the mean of three independent experiments ( $\pm$ SEM), measured in duplicates (B), \*,  $p < 0.05$ ; \*\*,  $p < 0.01$ ; \*\*\* $p < 0.001$ .
